# Supplementary material for: A myeloid program associated with COVID-19 severity is decreased by therapeutic blockade of IL-6 signaling
Source: bioRxiv or medRxiv preprint supplement (doi:10.1101/2022.11.07.22282049), 2023-02-27
Supplement: Supplementary file [file media-1.pdf]

1 **Supplemental Data**

2  
3 **Supplemental Table 1. EN-RAGE gene set**

4

| ID              | Gene symbol | ID              | Gene symbol | ID              | Gene symbol  | ID              | Gene symbol |
|-----------------|-------------|-----------------|-------------|-----------------|--------------|-----------------|-------------|
| ENSG00000276900 | AC023157.3  | ENSG00000163412 | EIF4E3      | ENSG00000248323 | LOC101928000 | ENSG00000101236 | RNF24       |
| ENSG00000268734 | AC245128.3  | ENSG00000198734 | F5          | ENSG00000185022 | MAFF         | ENSG00000163221 | S100A12     |
| ENSG00000233461 | AL445524.1  | ENSG00000186431 | FCAR        | ENSG00000125505 | MBOAT7       | ENSG00000143546 | S100A8      |
| ENSG00000161944 | ASGR2       | ENSG00000085265 | FCN1        | ENSG00000140563 | MCTP2        | ENSG00000163220 | S100A9      |
| ENSG00000158825 | BATF        | ENSG00000125740 | FOSB        | ENSG00000257335 | MGAM         | ENSG00000213694 | S1PR3       |
| ENSG00000113916 | BCL6        | ENSG00000171051 | FPR1        | ENSG00000172965 | MIR4435-2HG  | ENSG00000155307 | SAMSN1      |
| ENSG00000163823 | CCR1        | ENSG00000171049 | FPR2        | ENSG00000008516 | MMP25        | ENSG00000197632 | SERPINE2    |
| ENSG00000125810 | CD93        | ENSG00000123689 | G0S2        | ENSG00000059728 | MXD1         | ENSG00000197208 | SLC22A4     |
| ENSG00000158825 | CDA         | ENSG00000151948 | GLT1D1      | ENSG00000105835 | NAMPT        | ENSG00000147454 | SLC25A37    |
| ENSG00000131873 | CHSY1       | ENSG00000170837 | GPR27       | ENSG00000165030 | NFIL3        | ENSG00000059804 | SLC2A3      |
| ENSG00000136026 | CKAP4       | ENSG00000139572 | GPR84       | ENSG00000100906 | NFKBIA       | ENSG00000082014 | SMARCD3     |
| ENSG00000166527 | CLEC4D      | ENSG00000136630 | HLX         | ENSG00000087157 | PGS1         | ENSG00000122862 | SRGN        |
| ENSG00000166523 | CLEC4E      | ENSG00000173083 | HPSE        | ENSG00000105520 | PLPPR2       | ENSG00000180953 | ST20        |
| ENSG00000120885 | CLU         | ENSG00000160888 | IER2        | ENSG00000163421 | PROK2        | ENSG00000010327 | STAB1       |
| ENSG00000146592 | CREB5       | ENSG00000137331 | IER3        | ENSG00000140368 | PSTPIP1      | ENSG00000127954 | STEAP4      |
| ENSG00000103196 | CRISPLD2    | ENSG00000115594 | IL1R1       | ENSG00000125384 | PTGER2       | ENSG00000166900 | STX3        |
| ENSG00000163739 | CXCL1       | ENSG00000136689 | IL1RN       | ENSG00000073756 | PTGS2        | ENSG00000137462 | TLR2        |
| ENSG00000169429 | CXCL8       | ENSG00000157551 | KCNJ15      | ENSG00000155093 | PTPRN2       | ENSG00000173334 | TRIB1       |
| ENSG00000138061 | CYP1B1      | ENSG00000239998 | LILRA2      | ENSG00000089159 | PXN          | ENSG00000127824 | TUBA4A      |
| ENSG00000139318 | DUSP6       | ENSG00000187116 | LILRA5      | ENSG00000105514 | RAB3D        | ENSG00000038427 | VCAN        |
| ENSG00000135636 | DYSF        | ENSG00000182541 | LIMK2       | ENSG00000169385 | RNASE2       | ENSG00000229124 | VIM-AS1     |

5  
6  
7 **Supplementary Table 2. Reproducibility of EN-RAGE+ myeloid cell gene expression across**  
8 **cohorts and sample types. Spearman correlation coefficients are shown for pseudo-bulk EN-**  
9 **RAGE signature score and genes encoding myeloid functions within specific myeloid populations**  
10 **across scRNA-seq datasets. Positive correlations are shaded red and negative correlations shaded**  
11 **blue, with increasing darkness of shading indicating two tailed p values of p<0.05, p<0.01, and**  
12 **p<0.001. TA=tracheal aspirate, BAL=bronchoalveolar lavage. Blanks indicate transcript in below**  
13 **detection. Datasets: Liao et al.<sup>7</sup>, Grant et al.<sup>6</sup>, Delorey et al.<sup>5</sup>, Schulte-Schrepping et al.<sup>11</sup>, Silvin et**  
14 **al.<sup>12</sup>, COMET PBMC<sup>2</sup>, whole blood<sup>37</sup>, and ETA<sup>36</sup>.**

15  
16

| Spearman rho             |                      | HLA-DRA | HLA-DRB1 | CD14  | STAT3 | S100A12 | S100A9 | IL10 | PDL1 | PTGER2 | TGFB1 | IL1B  | IDO1  | CCR5  | CYBB  | ARG1  | CCR2  |       |
|--------------------------|----------------------|---------|----------|-------|-------|---------|--------|------|------|--------|-------|-------|-------|-------|-------|-------|-------|-------|
| Airway samples           | <b>Monocyte</b>      | n       |          |       |       |         |        |      |      |        |       |       |       |       |       |       |       |       |
|                          | TA MonoMac COMET     | 41      | 0.11     | -0.23 | 0.10  | 0.75    | 0.70   | 0.76 | 0.74 | 0.59   | 0.72  | 0.13  | 0.86  | 0.33  | 0.36  | 0.14  | 0.31  | 0.26  |
|                          | BAL monocyte Liao    | 12      | -0.90    | -0.97 | 0.73  | 0.71    | 0.92   | 0.38 | 0.82 | 0.58   | 0.89  | 0.89  | 0.74  | 0.69  | 0.80  | 0.07  |       | 0.73  |
|                          | BAL myeloid Grant    | 19      | 0.52     | 0.43  | 0.41  | 0.48    | 0.53   | 0.16 | 0.36 | 0.47   | 0.66  | 0.29  | 0.47  | 0.34  | 0.37  | 0.06  |       | -0.05 |
|                          | BAL macrophage Grant | 19      | -0.26    | -0.33 | 0.32  | 0.83    | 0.93   | 0.89 | 0.65 | 0.76   | 0.81  | 0.38  | 0.55  | 0.61  | 0.46  | -0.19 | 0.30  | 0.15  |
|                          | Lung myeloid Delorey | 24      | -0.01    | 0.00  | -0.02 | 0.65    | 0.76   | 0.32 | 0.77 | 0.85   | 0.74  | 0.29  | 0.87  | 0.65  | 0.43  | -0.15 | 0.53  | 0.28  |
|                          | <b>Neutrophil</b>    |         |          |       |       |         |        |      |      |        |       |       |       |       |       |       |       |       |
|                          | TA neutrophil COMET  | 40      | 0.05     | -0.16 | 0.58  | 0.63    | 0.74   | 0.85 | 0.53 | 0.61   | 0.35  | 0.54  | 0.78  | 0.30  | -0.02 | 0.21  | 0.59  | -0.09 |
|                          | BAL neutrophil Liao  | 11      | 0.34     | 0.35  | 0.82  | 0.84    | 0.89   | 0.96 |      | 0.99   | 0.87  | 0.96  | 0.83  | 0.93  | 0.80  | 0.85  |       | 0.15  |
|                          | <b>Blood samples</b> |         |          |       |       |         |        |      |      |        |       |       |       |       |       |       |       |       |
| <b>Monocyte</b>          | n                    |         |          |       |       |         |        |      |      |        |       |       |       |       |       |       |       |       |
| Blood monocyte COMET     | 18                   | -0.01   | 0.19     | 0.62  | 0.79  | 0.67    | 0.74   | 0.57 | 0.31 | 0.52   | 0.37  | 0.34  | 0.37  | 0.07  | 0.60  | 0.43  | 0.53  |       |
| Blood monocyte Schulte   | 33                   | -0.54   | -0.41    | 0.81  | 0.75  | 0.67    | 0.67   | 0.05 | 0.27 | 0.51   | 0.36  | -0.16 | 0.09  | 0.05  | 0.56  | -0.01 | 0.23  |       |
| Blood monocyte Silvin    | 6                    | -0.77   | -0.89    | 0.94  | 0.54  | 1.00    | 0.77   |      | 0.68 | -0.03  | 0.31  | -0.43 |       | 0.43  | 0.94  |       | 0.60  |       |
| PBMC monocyte COMET      | 44                   | -0.45   | -0.48    | 0.65  | 0.15  | 0.73    | 0.79   | 0.15 | 0.02 | 0.38   | 0.18  | 0.34  | -0.08 | -0.44 | 0.52  | -0.09 | 0.25  |       |
| PBMC monocyte Schulte    | 16                   | -0.73   | -0.54    | 0.75  | 0.86  | 0.57    | 0.71   | 0.66 | 0.43 | 0.77   | -0.20 | 0.64  | 0.02  | -0.40 | 0.40  | 0.65  | -0.56 |       |
| <b>Neutrophil</b>        |                      |         |          |       |       |         |        |      |      |        |       |       |       |       |       |       |       |       |
| Blood neutrophil COMET   | 18                   | -0.53   | -0.52    | 0.78  | 0.94  | 0.72    | 0.87   | 0.30 | 0.78 | -0.48  | 0.91  | 0.70  | 0.37  | 0.06  | 0.28  | 0.77  | -0.21 |       |
| Blood neutrophil Schulte | 33                   | -0.23   | -0.05    | 0.71  | 0.79  | 0.57    | 0.62   |      | 0.50 | 0.22   | 0.80  | -0.08 |       | 0.33  | 0.19  | 0.19  | -0.01 |       |
| Blood neutrophil Silvin  | 6                    | -0.37   | -0.77    | 1.00  | 0.20  | 1.00    | 0.94   |      | 0.60 | 0.82   | 0.60  | -0.03 |       |       | -0.09 | 0.54  | -0.85 |       |
| PBMC neutrophil Schulte  | 16                   | 0.21    | 0.46     | 0.54  | 0.74  | 0.63    | 0.68   |      | 0.62 | -0.11  | 0.91  | 0.80  | 0.55  |       | 0.23  | 0.47  |       |       |

17 **Supplementary Figure 1.** Further characterization of the signature within PBMC and BAL.  
18 UMAP plots from PBMC and BAL.  
19 A. UMAP projection of cells colored by cell types. Each point represents a single cell, and points  
20 are colored by annotated cell types. PBMC<sup>11</sup> or BAL<sup>7</sup>.  
21 B. UMAP projection of cells colored by EN-RAGE signature score. Each point represents a single  
22 cell, colored by the signature score value.  
23 C. Extended pseudo-bulk expression profiles including non-myeloid cell types. Each point  
24 represents the pseudo-bulk signature score for a cell type in a patient sample. Blue=healthy (BAL  
25 n = 3; PBMC, n = 3), orange=moderate (BAL, n = 3; PBMC, n = 8; hospitalized +/- supplemental  
26 O<sub>2</sub>), red=critical (BAL, n = 6; PBMC, n = 10; requiring mechanical ventilation), with severity  
27 defined within each published dataset by the original authors.  
28 D-G. Heatmaps of ENRAGE (D-E) and MS1 (F-G) signature genes in pseudo-bulk expression  
29 profiles in BAL and PBMC. Each row is a gene, each column is a cell cluster. Each row is z-score  
30 normalized within each dataset. LDG=low density granulocytes.  
31

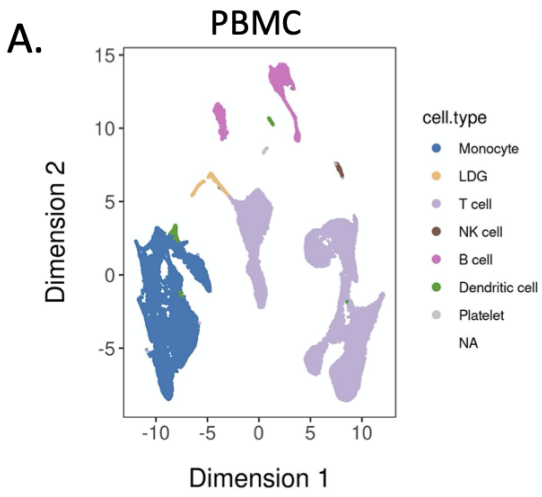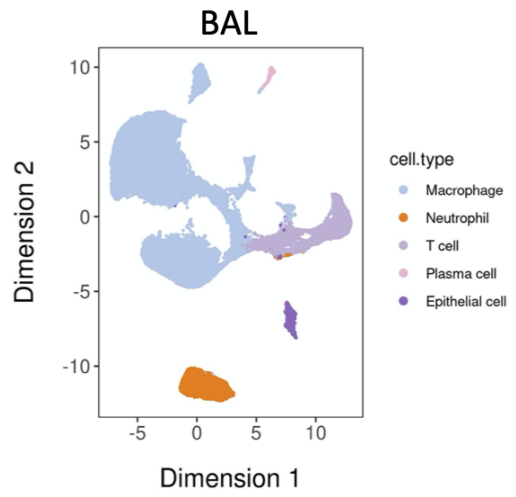

32

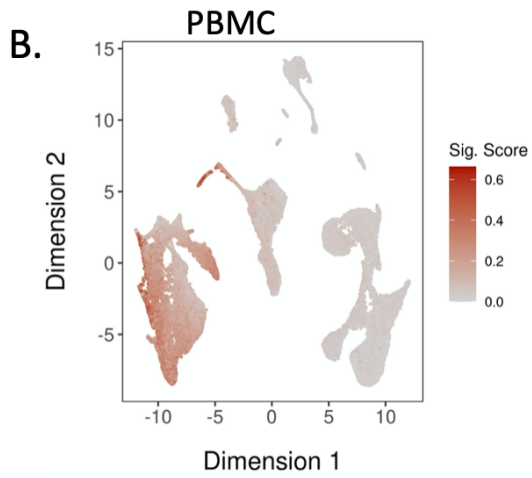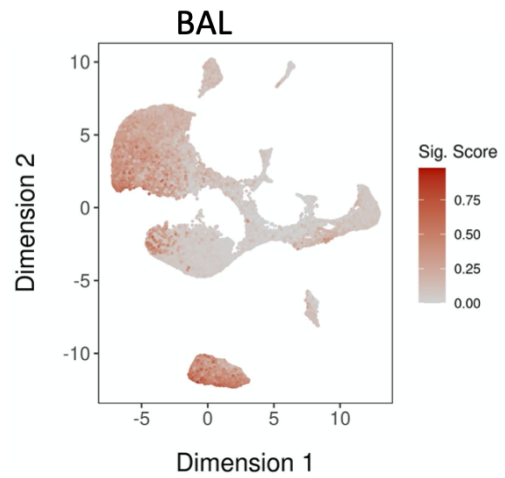

33

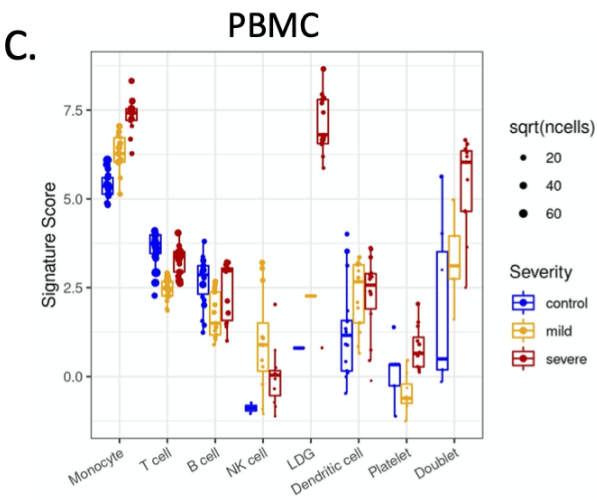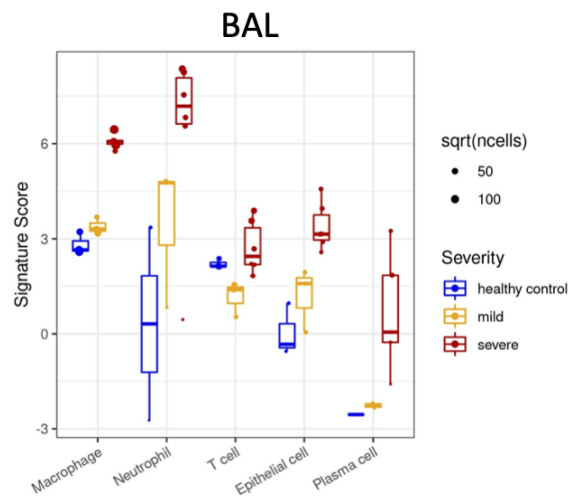

34

35 **Supplementary Figure 2.** Performance of ENRAGE signature across sample types (COMET  
 36 cohort). **A.** Pairwise Spearman correlation coefficients between genes within the ENRAGE and  
 37 MS1 gene signatures across three different compartments: ETA (n = 55), PBMC (n = 279), and  
 38 whole blood (n = 245). **B-E.** Heatmaps of gene expression (B-C) and pairwise gene correlations  
 39 (D-E) of ENRAGE and MS1 within the PBMC compartment (11). **F-I.** Heatmaps of gene  
 40 expression (F-G) and pairwise gene correlations (H-I) of the whole blood compartment (11). **J-M.**  
 41 Heatmaps of gene expression (J-K) and pairwise gene correlations (L-M) of ENRAGE and MS1  
 42 within the ETA compartment (7). Gene expression values were pseudobulked for each cell  
 43 population (sample + cell type) and the pairwise Spearman correlation coefficients were calculated  
 44 using the pseudobulked gene expression values. LDG=low-density granulocytes.

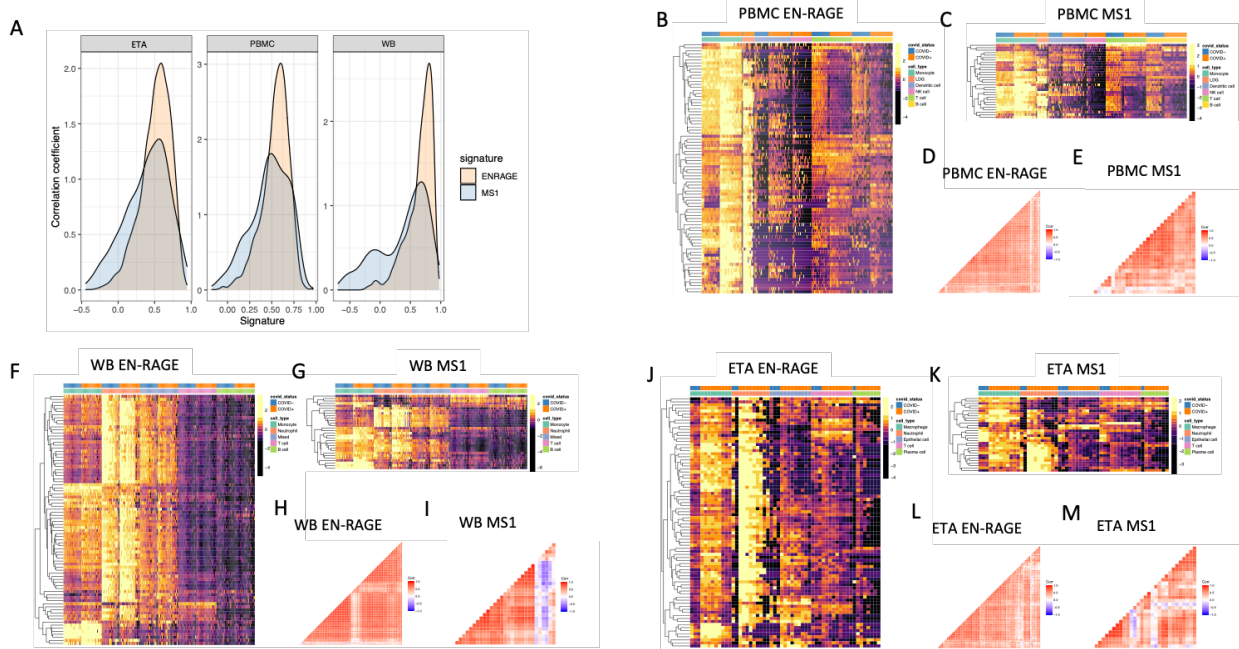

45  
 46

47 **Supplementary Figure 3.** EN-RAGE gene set expression in PBMCs is associated with increased  
 48 clinical severity and poor outcomes in the COMET cohort. **A.** Comparison of EN-RAGE signature  
 49 in monocytes from patients admitted to ICU compared to those not. **B-C.** Correlation between  
 50 baseline pseudobulk EN-RAGE gene set expression in myeloid cells and **B.** baseline NIH scale,  
 51 and **C.** maximal NIH scale (worst score recorded during hospitalization, excluding healthy  
 52 controls). Each dot represents one patient, n=49. **D-F.** Myeloid EN-RAGE gene set expression by  
 53 ARDS diagnosis. **D.** ARDS diagnosed using AECC criteria. **E.** ARDS diagnosed using Berlin  
 54 criteria. **F.** Berlin ARDS subset by COVID-19 status. Boxes represent first and third quartiles, the  
 55 centerline shows the median. Two-tailed t-test p-values are shown: n.s.= not significant, \*p<0.05,  
 56 \*\*p<0.01.

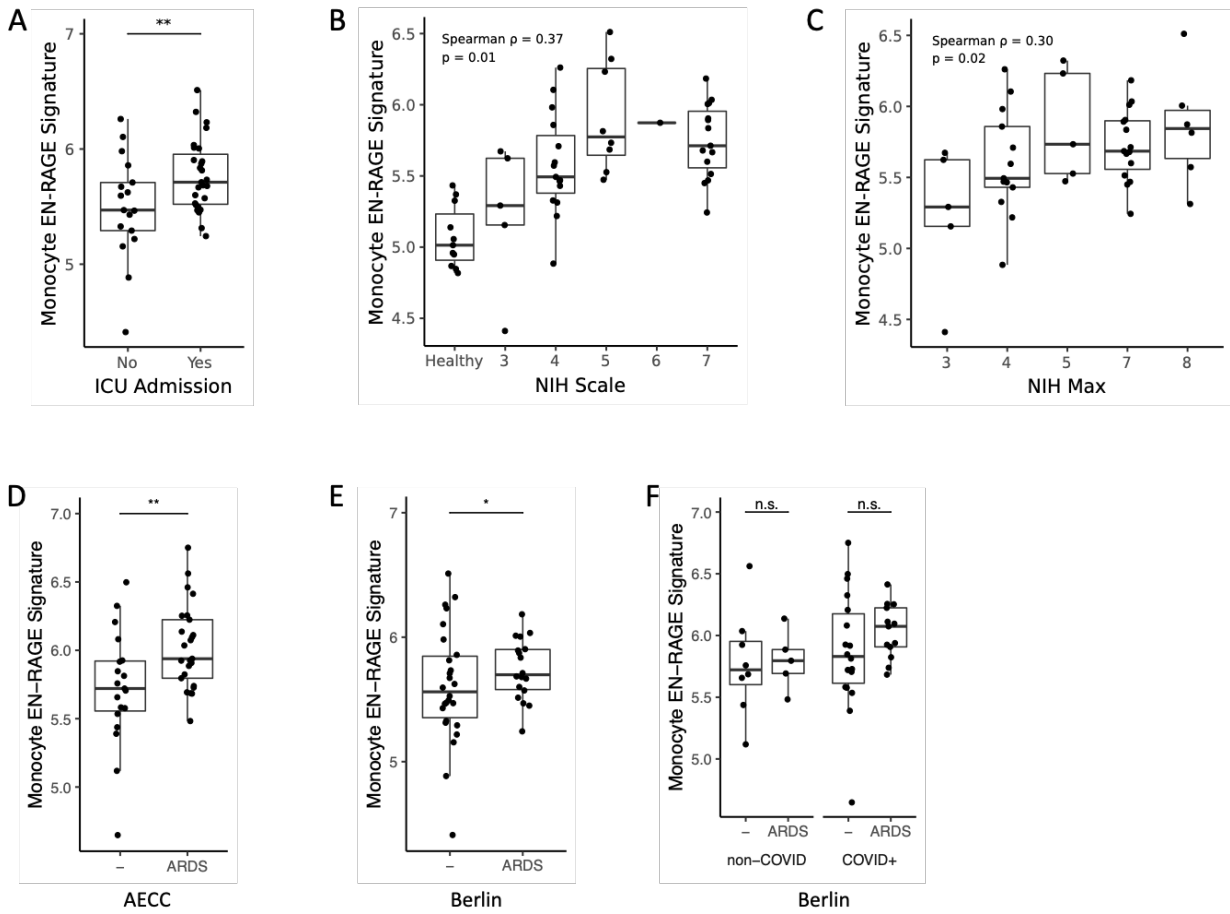

58

59 **Supplemental Figure 4.** Characterization of T cell immunosuppression phenotypes (COMET  
60 PBMC cohort; 128 samples from 60 patients [429, 505 cells]).  
61 Pseudobulked surface protein expression in 128 PBMC samples from 60 patients over 14 days in  
62 patients grouped by clinical outcomes. A-D. CD8<sup>+</sup> T cells. E-H. CD4<sup>+</sup> T cells. Blue line denotes  
63 the linear regression trend for gene expression over time. Red line denotes the average expression  
64 level in 11 healthy controls. Vent. duration = days of mechanical ventilation in survivors. Pearson  
65 correlation coefficients (r) and p values are indicated.  
66

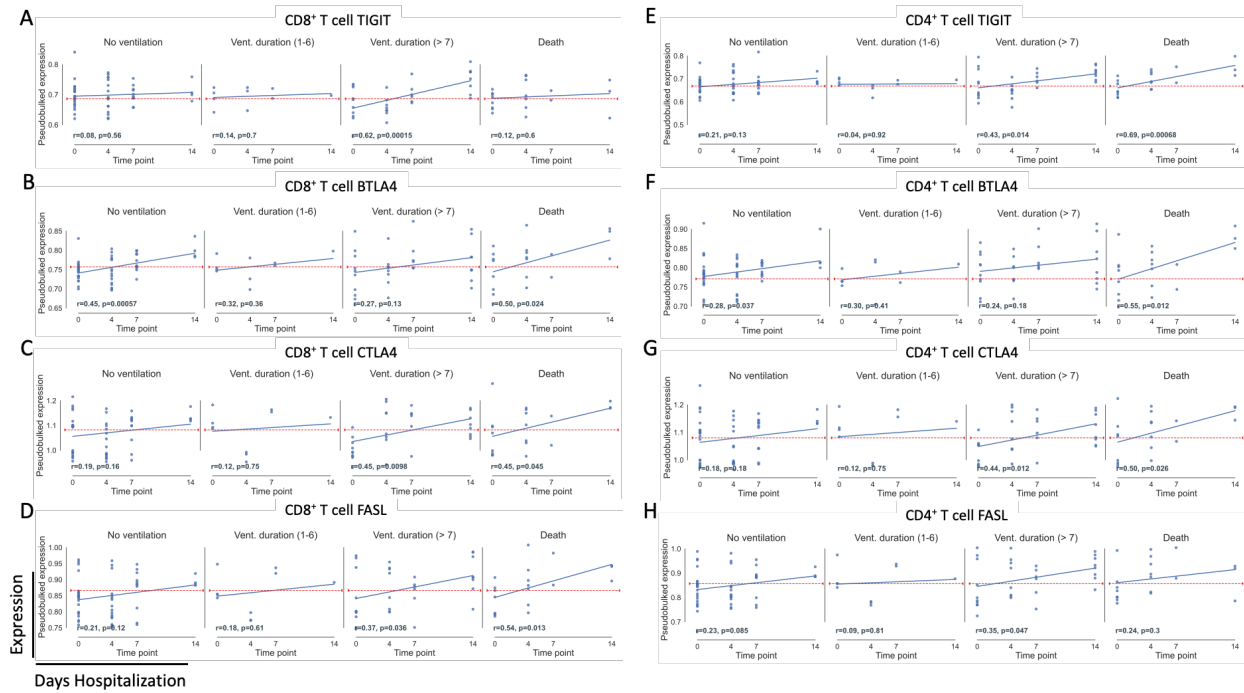

67

68  
69  
70

**Supplemental Figure 5.** IL-6 treatment of monocytes *in vitro* for 24 hours compared with media induces a gene program associated with potential T cell suppressive functionality. Heat map of the genes in Supplemental Table 1 using unsupervised clustering.

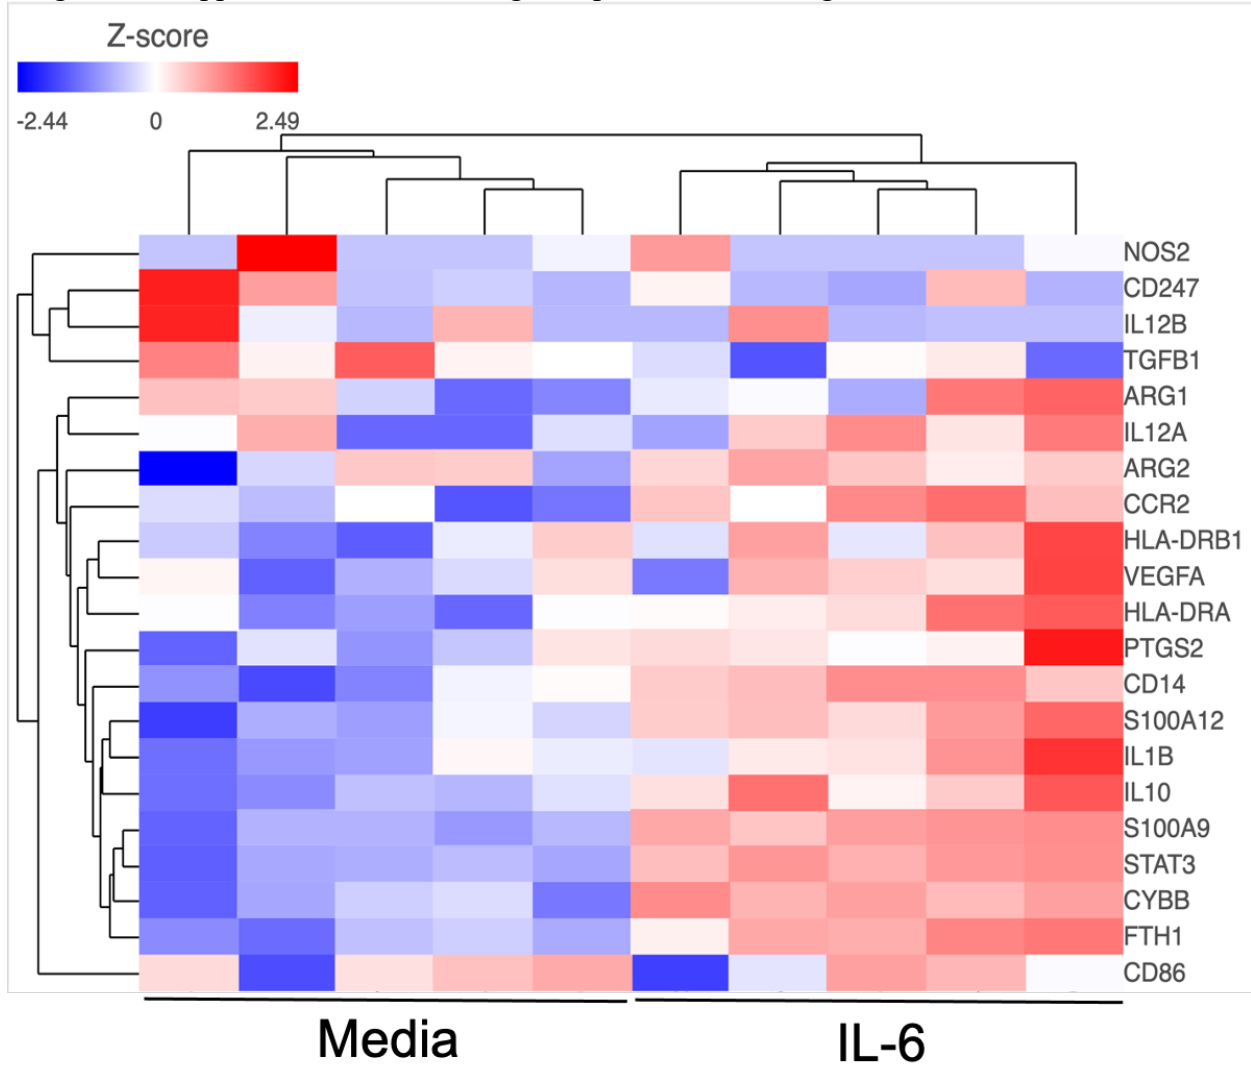

71

72 **Supplemental Figure 6.** Myeloid and T cell gene sets are associated with poor outcome in  
 73 COVID-19 patients and decreased by tocilizumab treatment.  
 74 GSEA for EN-RAGE and MS1 gene sets are similar. GSEA enrichments are consistent with those  
 75 in Figure 6B-E following adjustment for A. baseline blood % monocytes, B. baseline %  
 76 neutrophils, or C. baseline % lymphocytes. D-E. The effect of tocilizumab treatment is not  
 77 affected by baseline tertile of serum IL-6 protein levels, with 1=lowest tertile and 3=highest tertile.  
 78 GSEA are shown when FDR<0.05 (red) and shaded grey when p<0.01 but FDR>0.05.  
 79 NES=normalized enrichment score.

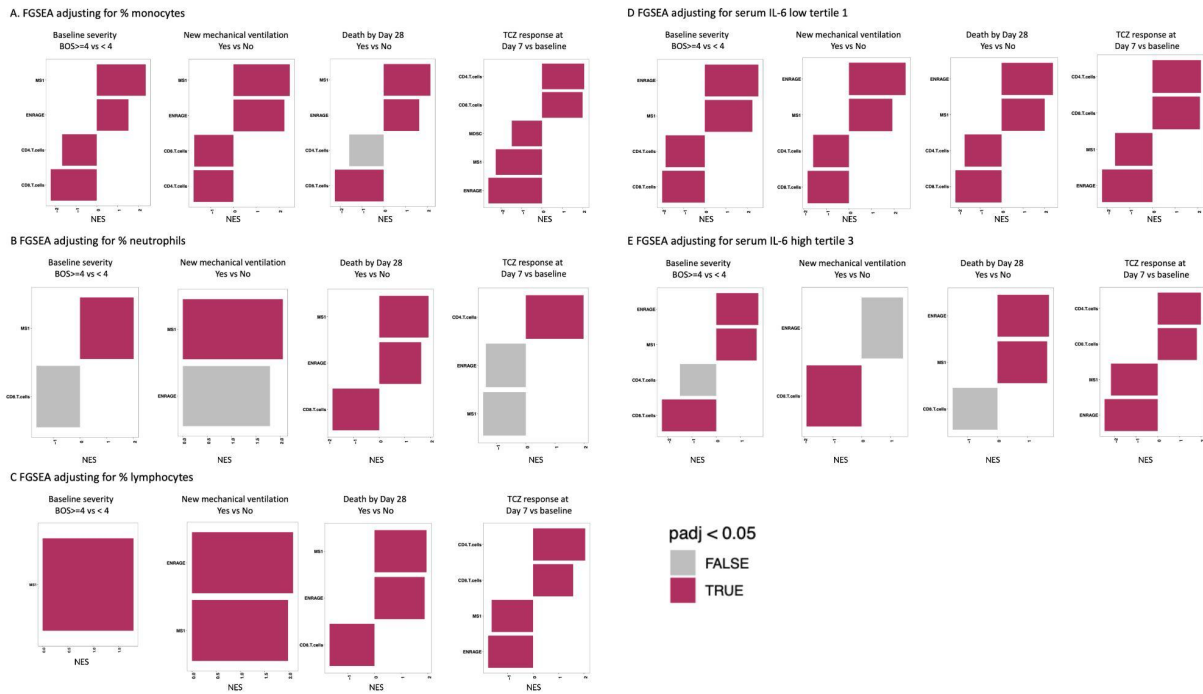

80  
81



82 **Supplemental Figure 7. A-D.** Tocilizumab increases expression of blood myeloid and T cell  
 83 signature genes and cell composition more than placebo over 7 days of treatment. Signature scores  
 84 are shown within each day, split by treatment arm and disease course and compared with healthy  
 85 controls (CTRL). Patients are split into those that were discharged before D28, those who remained  
 86 hospitalized, or subjects who died by day 28. Average signature scores are shown across the first  
 87 7 days of treatment for patients with measurements at all 3 time points. **A-B.** Tocilizumab  
 88 treatment decreases expression of **(A)** ENRAGE and **(B)** MS1 myeloid signatures in survivors. **C-**  
 89 **D.** Tocilizumab treatment increased expression of **(C)** CD8<sup>+</sup> and **(D)** CD4<sup>+</sup> T cell signatures in  
 90 survivors. **E-J.** Tocilizumab normalizes blood cell composition more rapidly than placebo. Blood  
 91 cell percentage **(E-G)** and absolute cell counts **(H-J)** are shown at D1 (pre-treatment) and D3 and  
 92 D4-D10 (post-treatment); FDR calculated relative to D1 \* = p < 0.05, \*\* = p < 0.01, \*\*\* = p <  
 93 0.001, \*\*\*\* = p < 0.0001, ns = non-significant. Significance testing was performed using either t-  
 94 test (A-D) or Wilcoxon rank-sum test (E-J). SOC = standard of care drug therapy. For box plots,  
 95 each point represents a patient sample, center lines depict the median value, the bottom and top of  
 96 the boxes show the first and third quartile, and whiskers show the most extreme point <1.5x the  
 97 interquartile range (IQR) from the bottom or top of the box.

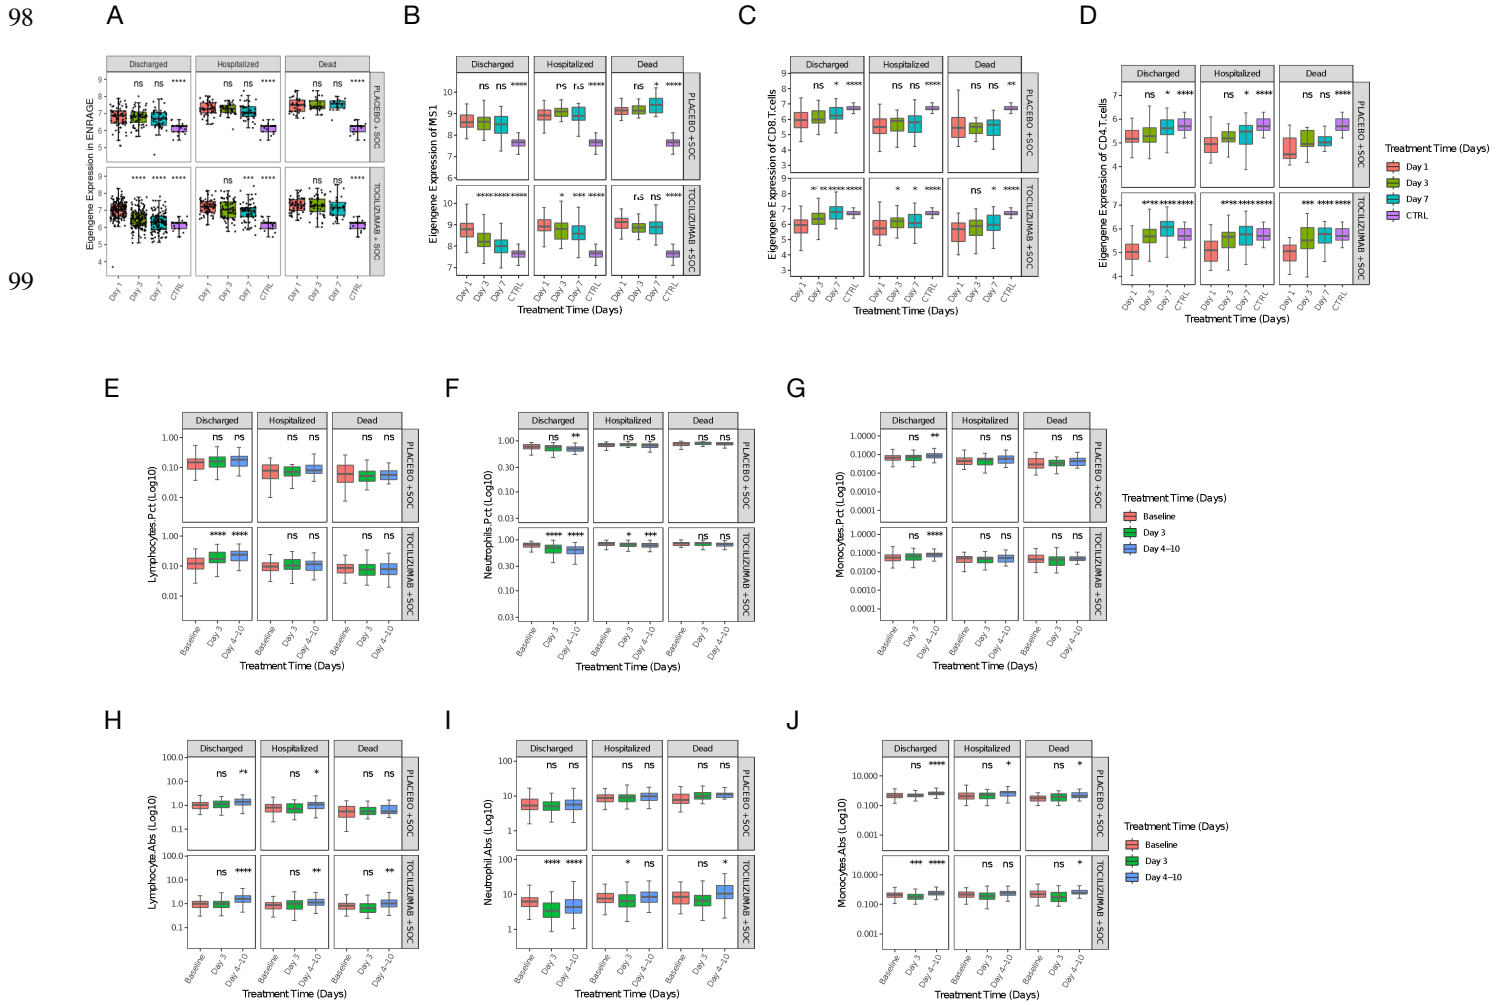

100 **Supplemental Figure 8.** Effect of tocilizumab on blood cell counts and serum protein levels  
 101 relative to ENRAGE gene set expression Day 7 vs Day 1. A. Correlation of blood ENRAGE gene  
 102 set expression with serum proteins and blood cell counts on D1 prior to treatment. IL-10 was  
 103 measured by Protein Simple and IL-1 $\beta$ , ENRAGE, and Arg1 were measured by Olink. D-H.  
 104 Spearman correlations between change in blood ENRAGE gene set expression and change in  
 105 blood cell counts (B-D) and serum proteins (E-H) between D1 and D7. Each dot represents a  
 106 patient with available samples at D1 and D7, SOC = standard of care drug therapy.

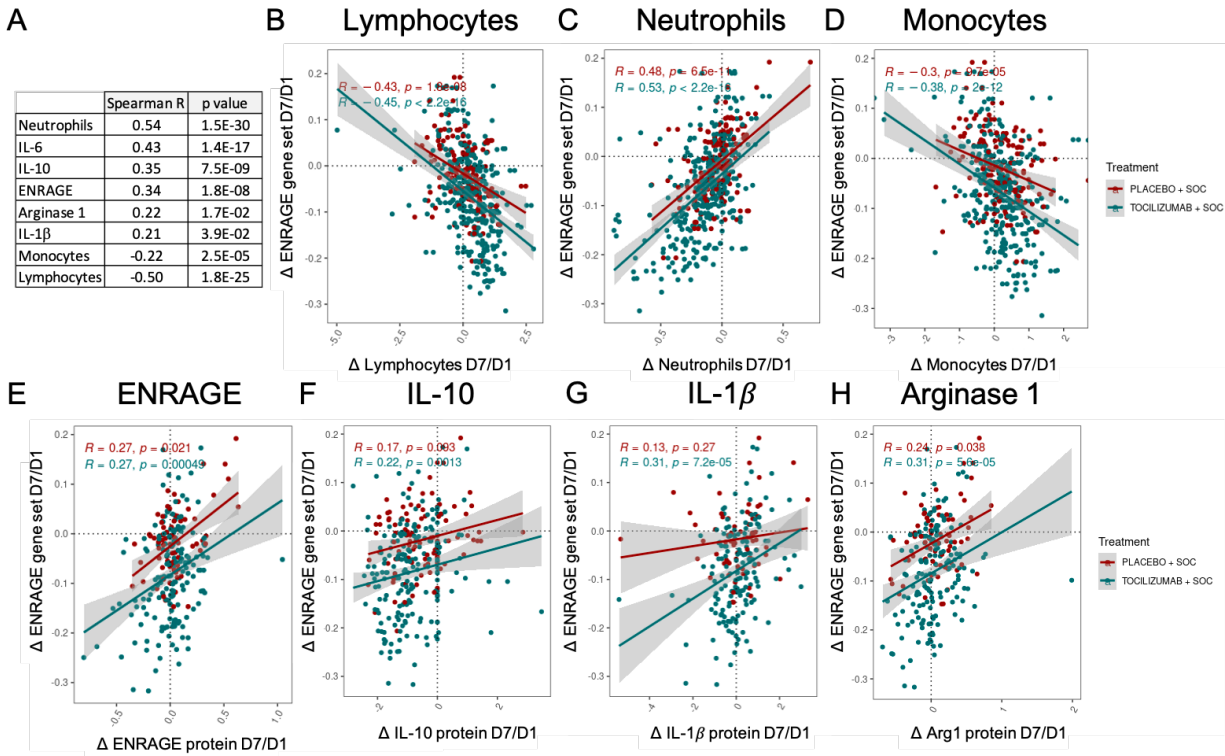

108  
 109
